# Supplementary material for: Explanation of the Compensation Law and the Isokinetic Point in the Electrical Conduction of Crosslinked Polyethylene
Source: Hindawi journal article supplement (doi:10.1155/2022/7060337), 2022-02-07
Supplement: f1 [file 7060337.f1.docx]

Explanation of the compensation law and the isokinetic point in the electrical conduction of XLPE

Dr. Roger Walker*, Dr. Eugene Furman, Dr. William H. Hunter Woodward, and Dr. Michael Lanagan

Dr. Roger Walker, Dr. Michael Lanagan

The Pennsylvania State University, Department of Materials Science and Engineering, University Park, PA 16802, USA
E-mail: rcw202@psu.edu

Dr. Eugene Furman

The Pennsylvania State University, Materials Research Institute, University Park, PA 16802, USA

Dr. William H. Hunter Woodward

The Dow Chemical Company, Analytical Sciences, Core R&D, Midland, MI 48667, USA

**Supplemental Information**

Figure S1: a) Conductivity plot of schematic data with an isokinetic point at 90.5°C; b) Conductivity plot of schematic data without an isokinetic point; c) Compensation plots of the two schematic sets of conductivity data, both showing compensation with excellent fit.


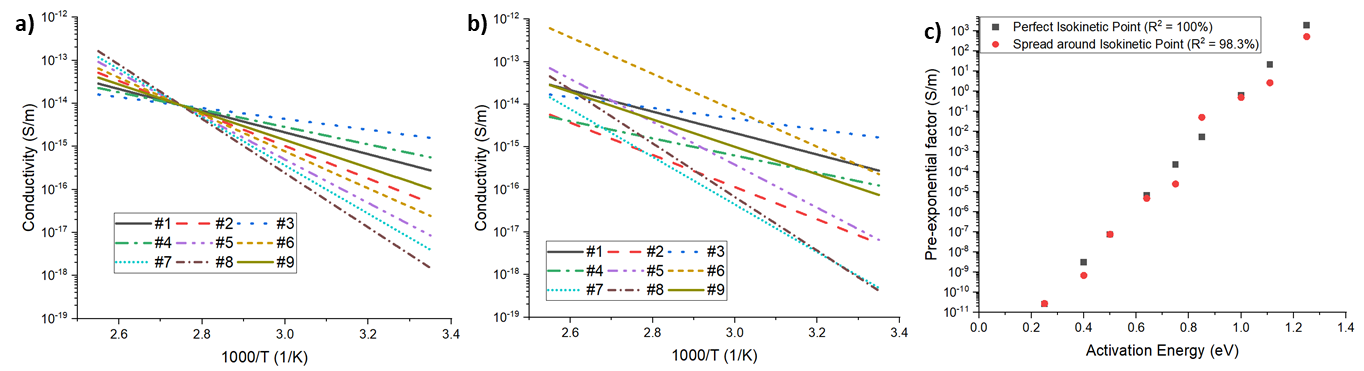


Table S1: Summary table of activation energies and Meyer-Neldel temperatures by sample type

| Sample Type | Lowest EA (eV) | Highest EA (eV) | TMNR (°C) |
| --- | --- | --- | --- |
| d-XLPE – BDS | 0.302 | 1.233 | 89.87 |
| d-XLPE – CCM | 0.178 | 0.921 | 53.345 |
| d-LDPE – BDS | 0.263 | 1.385 | 70.97 |
| d-LDPE – CCM | 0.251 | 0.777 | 58.3 |
| Water-soaked XLPE – BDS | 0.101 | 0.248 | n/a |
| Water-soaked XLPE – CCM | 0.438 | 0.768 | n/a |
| Water-soaked d-XLPE – BDS | 0.233 | 0.838 | 97.4 |
| Water-soaked d-XLPE – CCM | 0.526 | 0.788 | n/a |
| d-XLPE and d-LDPE (1st runs) – CCM | 0.178 | 0.921 | 58.3 |
| d-XLPE (2nd runs and on) – BDS | 0.156 | 1.054 | 106.2 |
| d-XLPE and d-LDPE (2nd runs and on) – CCM | 0.373 | 0.794 | 120.9 |
